# Supplementary material
Source: publisher figshare collection journal article supplement (https://gsajournals.figshare.com/articles/dataset/_/9773615)
Supplement: Supplementary file 1 [file 1]

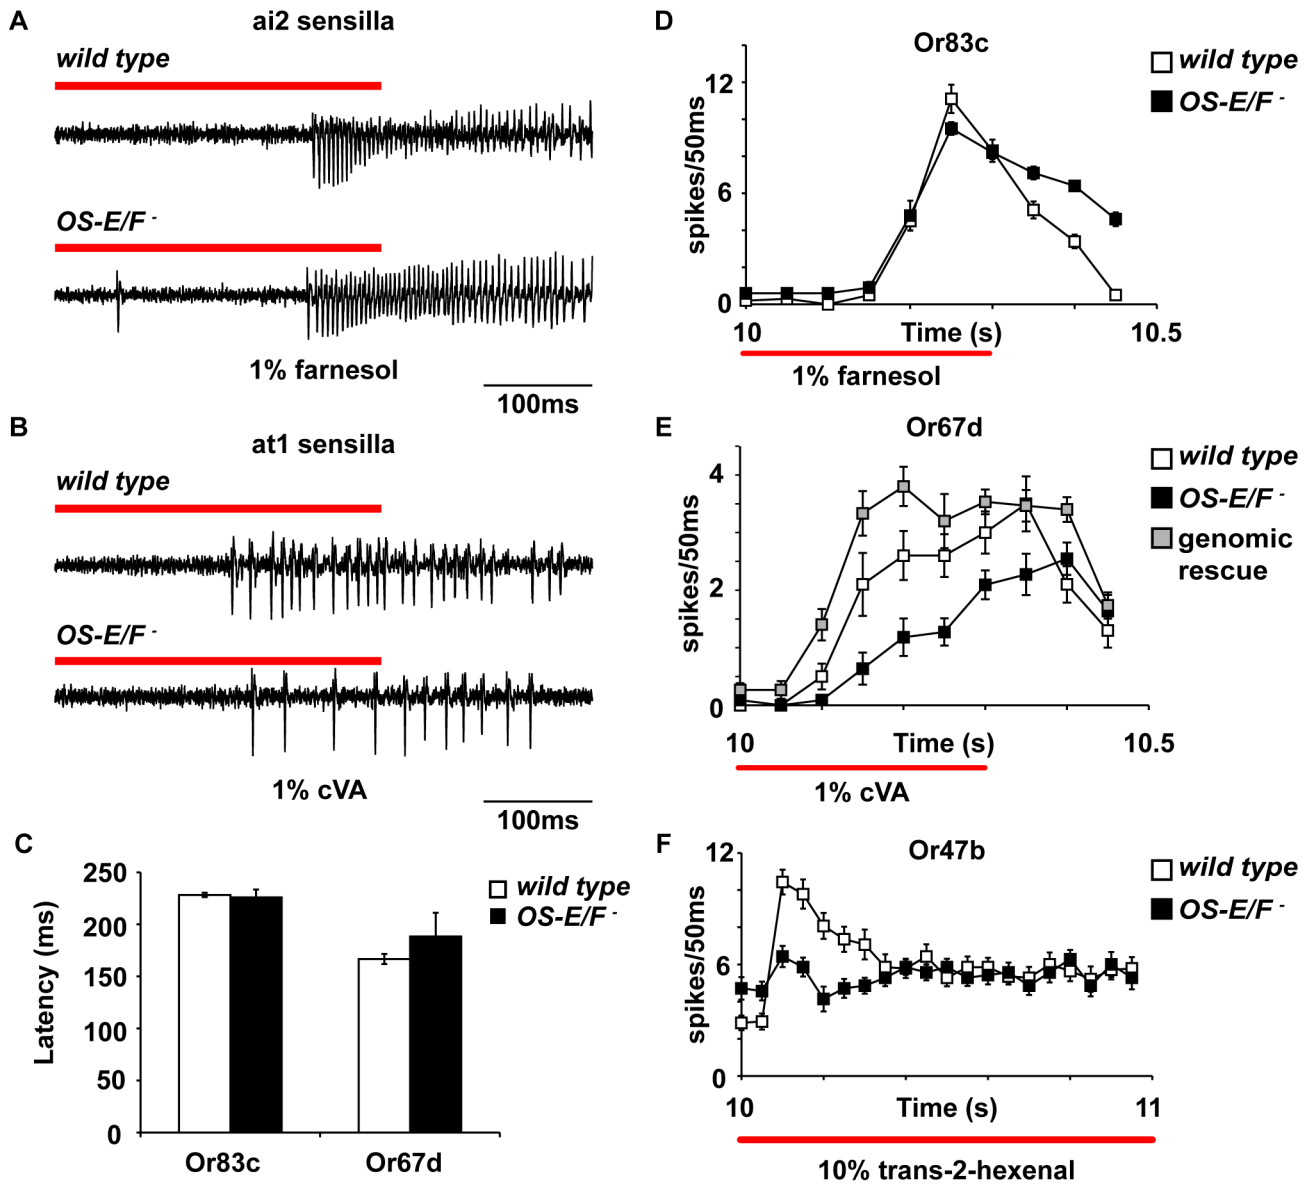

**Supplemental Figure 3** Latency to activation in *OS-E/F* mutants. (A) Sample 500 ms traces from wild type and *OS-E/F* mutant ai2 sensilla stimulated with 1% farnesol. (B) Sample 500 ms traces from wild type and *OS-E/F* mutant at1 sensilla stimulated with 1% cVA. (C) Quantification of the time at which the first spike in the spike train occurs for Or83c and Or67d neurons for genotypes shown. (D) Time course of Or83c activation measured in 50 ms bins. (E) Time course of Or67d activation measured in 50 ms bins. (F) Time course of Or47b activation measured in 50 ms bins. Red bars denote stimulus.
