# Supplementary material
Source: publisher figshare collection journal article supplement (https://gsajournals.figshare.com/articles/dataset/_/9773615)
Supplement: Supplementary file 2 [file 1]

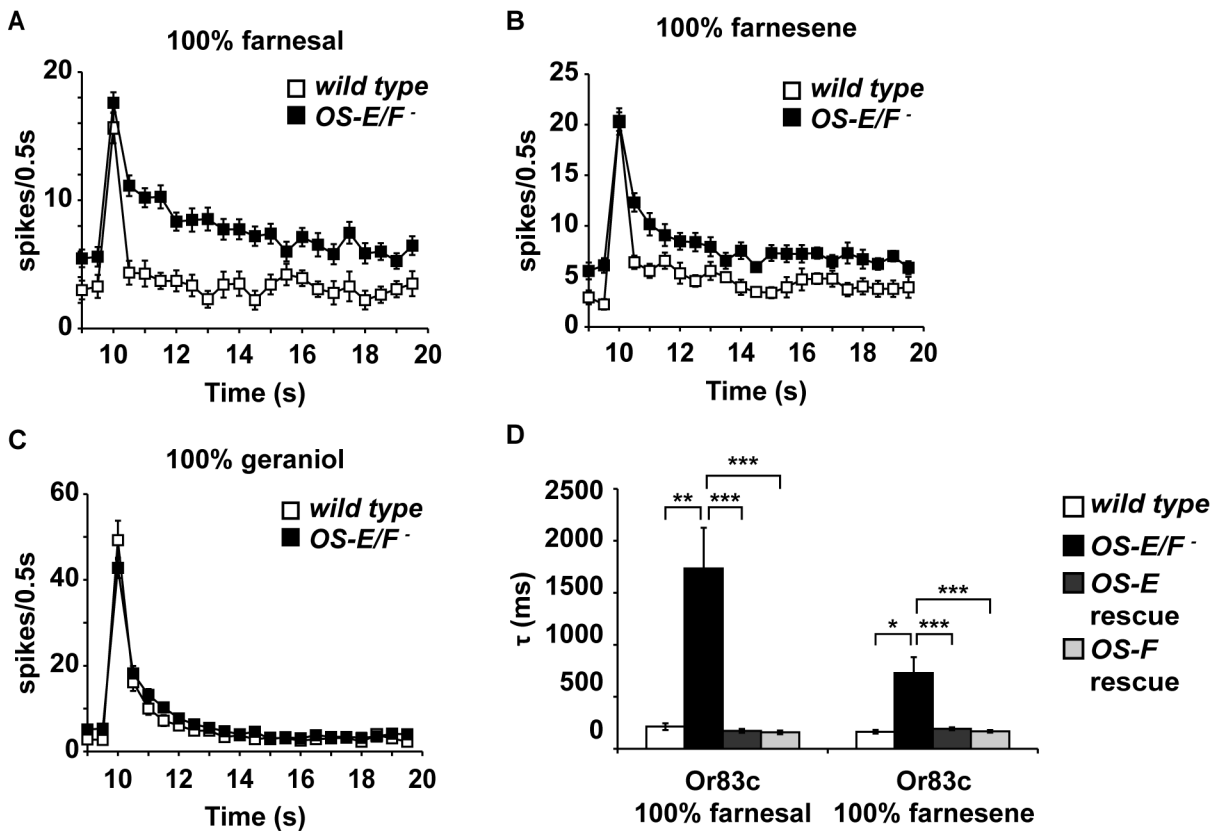

**Supplemental Figure 4** The Or83c deactivation defect is specific to farnesol variants. (A) Time course of responses of Or83c neurons to 100% farnesal. Deactivation time constant  $\tau = 182.6 \pm 25.7$  ms for wild type, and  $1111.8 \pm 2436$  ms for *OS-E/F* mutant ( $p=0.0012$ ,  $n=10$ ). (B) Time course of responses of Or83c neurons to 100% farnesene. Deactivation time constant  $\tau = 191.8 \pm 15.7$  ms for wild type,  $583.6 \pm 177.5$  ms for *OS-E/F* mutant ( $p=0.03$ ,  $n=10$ ). (C) Time course of responses of Or83c neurons to 100% geraniol. Deactivation time constant  $\tau = 322.4 \pm 99.7$  ms for wild type,  $371.6 \pm 36.7$  ms for *OS-E/F* mutant ( $p=0.71$ ,  $n=10$ ). (D) Time constant  $\tau$  of deactivation of Or83c neurons to farnesal or farnesene for the genotypes shown. Deactivation time constants of Or83c neurons to farnesal (left side of graph): wild type =  $213.3 \pm 31.9$  ms, *OS-E/F* mutant =  $1733.4 \pm 392.8$  ms, *OS-E* rescue =  $172.0 \pm 18.4$  ms, *OS-F* rescue =  $158.2 \pm 17.8$  ms. ANOVA  $p$  values: wild type to *OS-E/F* mutant = 0.001; *OS-E/F* mutant to *OS-E* rescue = 0.001; *OS-E/F* mutant to *OS-F* rescue =  $3.9 \times 10^{-4}$ ; wild type to *OS-E* rescue = 0.24; wild type to *OS-F* rescue = 0.11; *OS-E* rescue to *OS-F* rescue = 0.59. Deactivation time constants of Or83c neurons to farnesene (right side of graph): wild type =  $164.2 \pm 17.5$  ms, *OS-E/F* mutant =  $728.9 \pm 152.4$  ms; *OS-E* rescue =  $192.5 \pm 13.9$  ms; *OS-F* rescue =

168.4 ± 12.8 ms. ANOVA p values: wild type to *OS-E/F* mutant = 0.015; *OS-E/F* mutant to *OS-E* rescue = 0.0011; *OS-E/F* mutant to *OS-F* rescue = 3.17x10<sup>-4</sup>; wild type to *OS-E* rescue = 0.23; wild type to *OS-F* rescue = 0.85; *OS-E* rescue to *OS-F* rescue = 0.21. n < 10 per genotype. Error bars indicate SEM. p values for S4A-C determined by Student's t-test. p values for S4D determined by one-way ANOVA with post hoc Tukey's test.
