# Supplementary material
Source: publisher figshare collection journal article supplement (https://gsajournals.figshare.com/articles/dataset/_/9773615)
Supplement: Supplementary file 3 [file 1]

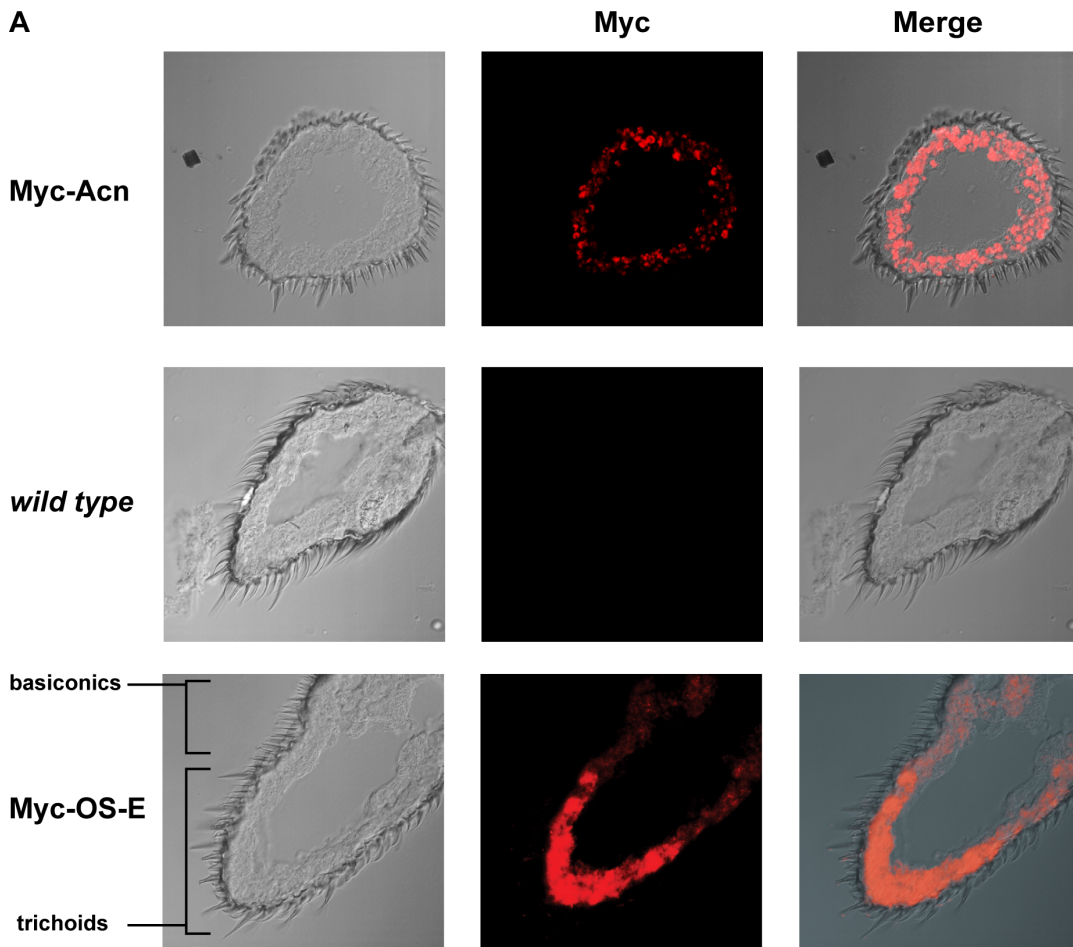

**Supplemental Figure 2** Myc-Tagged OS-E reveals striking expression level differences in trichoid and basiconic zones of the antenna. We introduced DNA encoding a myc tag in the *OS-E* gene just after the signal peptide cleavage site in the genomic rescue construct to produce a tagged OS-E protein and produced transgenic flies expressing this construct (See Materials and Methods). The tag prevented secretion of the tagged protein into the sensillum lymph, but effectively labeled the *OS-E* expressing cells. There is strong myc signal (bottom row) in the trichoid zone of the antenna (ventral lateral region) where the trichoid and intermediate sensilla are clustered (RIESGO-ESCOVAR *et al.* 1997). Expression in the basiconic zone was detectable, but at substantially reduced levels. Myc-tagged Acinus (top row) was used as a positive control for myc. No myc signal is detectable in wild type (middle row).
