# Supplementary material
Source: publisher figshare collection journal article supplement (https://gsajournals.figshare.com/articles/dataset/_/9773615)
Supplement: Supplementary file 4 [file 1]

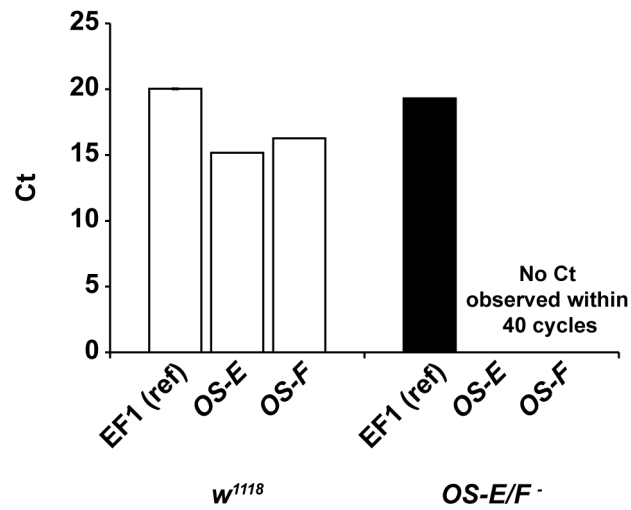

**Supplemental Figure 1** QPCR confirmation for loss of OS-E and OS-F expression. qPCR analysis of RNA isolated from wild type or OS-E/F deletion mutants confirmed loss of expression of the OBP genes. *EF1* (elongation factor 1) is the control for RNA integrity and was expressed at similar levels in both samples. However, both OS-E and OS-F transcripts, which are abundant in the wild type, are absent in the mutant.
